# Supplementary material
Source: publisher figshare collection journal article supplement (https://acs.figshare.com/ndownloader/files/4276764)
Supplement: Supplementary file 3 [file 4276764]

Archive with 10 entries (9 files):
- Nahnsen_ConsensusID_revised2_supplement/
- Nahnsen_ConsensusID_revised2_supplement/JPR-nahnsen-ConsensusIdentification_supplement_revised2.pdf
- Nahnsen_ConsensusID_revised2_supplement/JPR-nahnsen-ConsensusIdentification_supplement_revised2.tex
- Nahnsen_ConsensusID_revised2_supplement/similarity-matrices.xls
- Nahnsen_ConsensusID_revised2_supplement/SuppFig1.pdf
- Nahnsen_ConsensusID_revised2_supplement/SuppFig2a.pdf
- Nahnsen_ConsensusID_revised2_supplement/SuppFig2b.pdf
- Nahnsen_ConsensusID_revised2_supplement/SuppFig3.pdf
- Nahnsen_ConsensusID_revised2_supplement/SuppFig4.pdf
- Nahnsen_ConsensusID_revised2_supplement/SuppFig5.pdf
