# Supplementary material
Source: publisher figshare collection journal article supplement (https://acs.figshare.com/ndownloader/files/4276764)
Supplement: Supplementary file 3 [file 4276764 › Nahnsen_ConsensusID_revised2_supplement/JPR-nahnsen-ConsensusIdentification_supplement_revised2.tex]

%%%%%%%%%%%%%%%%%%%%%%%%%%%%%%%%%%%%%%%%%%%%%%%%%%%%%%%%%%%%%%%%%%%%%
%% This is a (brief) model paper using the achemso class
%% The document class accepts keyval options, which should include
%% the target journal and optionally the macuscript type.
%%%%%%%%%%%%%%%%%%%%%%%%%%%%%%%%%%%%%%%%%%%%%%%%%%%%%%%%%%%%%%%%%%%%%
\documentclass[journal=jprobs,manuscript=article]{achemso}

%%%%%%%%%%%%%%%%%%%%%%%%%%%%%%%%%%%%%%%%%%%%%%%%%%%%%%%%%%%%%%%%%%%%%
%% Place any additional packages needed here.  Only include packages
%% which are essential, to avoid problems later. Do NOT use any
%% packages which require e-TeX (for example etoolbox): the e-TeX
%% extensions are not currently available on the ACS conversion
%% servers.
%%%%%%%%%%%%%%%%%%%%%%%%%%%%%%%%%%%%%%%%%%%%%%%%%%%%%%%%%%%%%%%%%%%%%
\usepackage[version=3]{mhchem} % Formula subscripts using \ce{}
\usepackage{color}
\usepackage{subfigure}

%%%%%%%%%%%%%%%%%%%%%%%%%%%%%%%%%%%%%%%%%%%%%%%%%%%%%%%%%%%%%%%%%%%%%
%% If issues arise when submitting your manuscript, you may want to
%% un-comment the next line.  This provides information on the
%% version of every file you have used.
%%%%%%%%%%%%%%%%%%%%%%%%%%%%%%%%%%%%%%%%%%%%%%%%%%%%%%%%%%%%%%%%%%%%%
%%\listfiles

%%%%%%%%%%%%%%%%%%%%%%%%%%%%%%%%%%%%%%%%%%%%%%%%%%%%%%%%%%%%%%%%%%%%%
%% Place any additional macros here.  Please use \newcommand* where
%% possible, and avoid layout-changing macros (which are not used
%% when typesetting).
%%%%%%%%%%%%%%%%%%%%%%%%%%%%%%%%%%%%%%%%%%%%%%%%%%%%%%%%%%%%%%%%%%%%%
\newcommand*{\mycommand}[1]{\texttt{\emph{#1}}}

%%%%%%%%%%%%%%%%%%%%%%%%%%%%%%%%%%%%%%%%%%%%%%%%%%%%%%%%%%%%%%%%%%%%%
%% Meta-data block
%% ---------------
%% Each author should be given as a separate \author command.
%%
%% Corresponding authors should have an e-mail given after the author
%% name as an \email command.
%%
%% The affiliation of authors is given after the authors; each
%% \affiliation command applies to all preceding authors not already
%% assigned an affiliation.
%%
%% The affiliation takes an option argument for the short name.  This
%% will typically be something like "University of Somewhere".
%%
%% The \altaffiliation macro should be used for new address, etc.
%% On the other hand, \alsoaffiliation is used on a per author basis
%% when authors are associated with multiple institutions.
%%%%%%%%%%%%%%%%%%%%%%%%%%%%%%%%%%%%%%%%%%%%%%%%%%%%%%%%%%%%%%%%%%%%%
\author{Sven Nahnsen}
\email{sven.nahnsen@uni-tuebingen.de}
\affiliation[Center for Bioinformatics, T{\"u}bingen]
{Center for Bioinformatics, Eberhard Karls University, 72076 T{\"u}bingen, Germany}
\author{Andreas Bertsch}
\affiliation[Center for Bioinformatics, T{\"u}bingen]
{Center for Bioinformatics, Eberhard Karls University, 72076 T{\"u}bingen, Germany}
\author{J{\"o}rg Rahnenf{\"u}hrer}
\affiliation[Department of Statistics, Dortmund]
{Department of Statistics, Dortmund University of Technology, 44221 Dortmund, Germany}
\author{Alfred Nordheim}
\affiliation[Department of Molecular Biology, T{\"u}bingen]
{Department of Molecular Biology, Eberhard Karls University, 72076 T{\"u}bingen, Germany}
\author{Oliver Kohlbacher}
\affiliation[Center for Bioinformatics, T{\"u}bingen]
{Center for Bioinformatics, Eberhard Karls University, 72076 T{\"u}bingen, Germany}
%%%%%%%%%%%%%%%%%%%%%%%%%%%%%%%%%%%%%%%%%%%%%%%%%%%%%%%%%%%%%%%%%%%%%
%% The document title should be given as usual
%% A short title can be given as a *suggestion* for running headers.
%%%%%%%%%%%%%%%%%%%%%%%%%%%%%%%%%%%%%%%%%%%%%%%%%%%%%%%%%%%%%%%%%%%%%
\title[\texttt{achemso} Probabilistic Consensus Scoring in Tandem MS]
{Supplementary Material: \\Probabilistic Consensus Scoring Improves Tandem Mass Spectrometry Peptide Identification}

\begin{document}
\newpage
\section*{Calculation of consensus scores}
The excel document \textit{similarity-matrices.xls} contains all three similarity matrices that are important for the assignment of consensus scores to the spectrum in Fig. 1. These matrices have been calculated via pairwise sequence similarity (SeqSim) as described in the methods section. The calculation of the EQSATEQDILKK consensus score is now exemplified:\\
EQSATEQDILKK was assigned an E-value of 16 by Mascot. Via mixture modeling we assigned a posterior error probability of 97$\%$. The sequence was neither suggested by OMSSA nor by X!Tandem. The first similarity ($\alpha$) is the largest entry in the EQSATEQDILKK row from the Mascot-OMSSA matrix. $\alpha = 0.36$ reflects the similarity between EQSATEQDILKK and EDNMAIQSIIKK (which is the most similar candidate from the OMSSA search results). The second similarity ($\beta$) is the largest entry in the EQSATEQDILKK row from the Mascot-X!Tandem matrix. $\beta = 0.3$ reflects the similarity between QRESTATDILQK and EQSATEQDILKK. The consensus score is then further calculated:
\[
\frac{\text{Mascot}(EQSATEQDILKK) + \alpha\cdot \text{OMSSA}(EDNMAIQSIIKK) + \beta\cdot\text{X!Tandem}(QRESTATDILQK)}
{(1+\alpha+\beta)^2}
\]  
\[=\frac{0.97 + 0.36 \cdot 0.98 + 0.3 \cdot 0.54}{(1+0.36+0.3)^2}=0.53  
\]
\pagebreak
%
\section*{Suppl. Figure captions}
{\bf Suppl. Figure 1:}\\
Correct peptide sequences on different ranks. The dark colors for X!Tandem and Mascot and the grey color for OMSSA correspond to the number of additional peptides.\\
{\bf Suppl. Figure 2:}\\
Presearches with broad tolerance windows to evaluate data quality.\\
{\bf Suppl. Figure 3:}\\
Different sets of spectra are annotated by different search engines. The overlap of spectra that were annotated by one, two or all three engines varies between the different search engines. Here annotated means that the search engine suggests any sequence for a given spectrum. \\
{\bf Suppl. Figure 4:}\\
Comparison of spc and matrix-based similarities between the top hit and sequences at lower ranks. \\
{\bf Suppl. Figure 5:}\\
ConsensusID in comparison to a machine learning method (PepArML) and a heuristic combination method (PepArML:heuristic cominber).\\

\newpage

\renewcommand{\tablename}{Suppl. Table}
\begin{table}[htb]
	\caption{True peptides on rank one, following individual database searches.}	\label{tbl:1}
\begin{center}
	\begin{tabular}{lcccc}
					&	Orbitrap&	FT Ultra 		 &LCQ 
\\\hline
	
Mascot		&	7046		&	4675  &	2142    \\
OMSSA			&	7086		&	4783  &	2679	 \\    
XTandem		&	10571		&	8424  &	3172   \\\hline
	\end{tabular}
	\end{center}
\end{table}

 \begin{table}[htb]
 \caption{Number of identified peptides following individual database searches at 1\% FDR.}	\label{tbl:2}
\begin{center}
	\begin{tabular}{lccc}
					&	Orbitrap&	FT Ultra 		&LCQ 
\\\hline
	
Mascot		&	3919 		&	3466  &	1314   \\
OMSSA			&	4719		&	3729  &	1786	 \\    
XTandem		&	7255		&	6220 &	1863   	\\\hline 
	\end{tabular}
	\end{center}
\end{table}
%
%\newpage
%%
%
% \begin{table}[htb]
% \caption{}	\label{tbl:3}
%\begin{center}
%	\begin{tabular}{lcccccc}
%					&	AELASCVVGDLGAK &	ELMSNGPGSIIGAK 		& ISCAEGALEALKK & QRESTATDILQK & EDNMAIQSIIKK & EIEEDSLEGLKK
%\\\hline
%	
%QRESTATDILQK		&	0 &	0 &	0 		&	1			& 0.093	& 0			\\
%WSVEEEELLKK			&	0	&	0 &	0.085	&	0			&	0			&	0.256 \\    
%EIEEDSLEGLKK		&	0	&	0 &	0.309	& 0			&	0.178	&	1  		\\
%EQSATEQDILKK		&	0 &	0 &	0.046	& 0.302	&	0.360	&	0.202 \\
%NTNNHNGHILKK		&	0	&	0 &	0			&	0			&	0.066	&	0 		\\    
%GSDKALIEVDSQK		&	0	&	0 &	0			& 0			&	0			&	0  		\\
%GIEDDLMDLIKK		& 0 & 0	&	0.056	&	0			&	0.269	&	0.333	\\
%IFHDFNIDLQK			& 0 & 0	&	0			&	0			&	0			&	0.023	\\
%CAACITPVELKK		& 0 & 0	&	0.102	&	0			&	0			&	0			\\ 
%AKGDASAQIAAMQK	& 0 & 0	&	0			&	0.058	&	0			&	0			\\\hline
%	\end{tabular}
%	\end{center}
%\end{table}

\pagebreak

\renewcommand{\figurename}{Suppl. Figure}
%
   \begin{figure}[htp]
 	\caption{}\hfill\\
 	\label{fig:1}
 	\begin{center}
 			\includegraphics[scale=0.7]{SuppFig1.pdf}
 	\end{center}
 \end{figure}
%
\begin{figure}[htp]
\caption{}
\label{fig:2}
\begin{center}
\subfigure[]{
\includegraphics[scale=0.4, angle=0]{SuppFig2a.pdf}}
\subfigure[]{
\includegraphics[scale=0.4, angle=0]{SuppFig2b.pdf}} 
\end{center}
\end{figure}
%
\begin{figure}[ht!]
\caption{}\hfill\\
\label{fig:3}
\begin{center}
\includegraphics[scale=0.7, angle=0]{SuppFig3.pdf}
\end{center}
\end{figure}
 
\newpage
\begin{figure}[htp]
\caption{}\hfill\\
\label{fig:Sims}
\begin{center}
\includegraphics[scale=0.6,angle=90]{SuppFig4.pdf}
\end{center}
\end{figure}

Suppl. Figure 4 was generated using the dataset from the 18 protein mix measured on an LTQ-Orbitrap. It was searched with OMSSA using parameters as described in the experimental procedures. It shows the percentage of sequence similarity of peptide candidates that are suggested by OMSSA at different ranks. The sequence similarity correlates very well with the percentage of overlapping fragment ion masses. At latter ranks the sequence similarity and the percentage of overlapping fragment ions decreases.\\
 
    \begin{figure}[ht!]
 	\caption{}\hfill\\
 	\label{fig:4}
 	\begin{center}
 			\includegraphics[scale=0.7, angle=0]{SuppFig5.pdf}
 	\end{center}
 \end{figure}
 
 
\end{document}

\end{document}
