# Supplementary material
Source: publisher figshare collection journal article supplement (https://acs.figshare.com/ndownloader/files/4276764)
Supplement: Supplementary file 3 [file 4276764 › Nahnsen_ConsensusID_revised2_supplement/similarity-matrices.xls]

## Sheet: Tabelle1
Similarity matrices for the example spectrum in Fig. 1:
Matrix 1: Similarities between all peptides assigned by Mascot to all peptides assigned by OMSSA
Mascot -OMSSA	AELASCVVGDLGAK	ELMSNGPGSIIGAK	ISCAEGALEALKK	QRESTATDILQK	EDNMAIQSIIKK	EIEEDSLEGLKK
QRESTATDILQK	0	0	0	1	0.09302	0
WSVEEEELLKK	0	0	0.085	0	0	0.25609
EIEEDSLEGLKK	0	0	0.309	0	0.178571	1
EQSATEQDILKK	0	0	0.046	0.30232	0.36046	0.2023
NTNNHNGHILKK	0	0	0	0	0.06666	0
GSDKALIEVDSQK	0	0	0	0	0	0
GIEDDLMDLIKK	0	0	0.056	0	0.269	0.3333
IFHDFNIDLQK	0	0	0	0	0	0.023809
CAACITPVELKK	0	0	0.102	0	0	0
AKGDASAQIAAMQK	0	0	0	0.0581	0	0
Matrix 2: Similarities between all peptides assigned by Mascot to all peptides assigned by X!Tandem
Mascot-X!Tandem	QRESTATDILQK
QRESTATDILQK	1
WSVEEEELLKK	0
EIEEDSLEGLKK	0
EQSATEQDILKK	0.30232
NTNNHNGHILKK	0
GSDKALIEVDSQK	0
GIEDDLMDLIKK	0
IFHDFNIDLQK	0
CAACITPVELKK	0
AKGDASAQIAAMQK	0.0581
Matrix 2: Similarities between all peptides assigned by OMSSA to all peptides assigned by X!Tandem
OMSSA-X!Tandem	QRESTATDILQK
AELASCVVGDLGAK	0
ELMSNGPGSIIGAK	0
ISCAEGALEALKK	0
QRESTATDILQK	1
EDNMAIQSIIKK	0.09302
EIEEDSLEGLKK	0
