# Supplementary material
Source: publisher figshare collection journal article supplement (https://acs.figshare.com/ndownloader/files/4276764)
Supplement: Supplementary file 3 [file 4276764 › Nahnsen_ConsensusID_revised2_supplement/SuppFig1.pdf]

LCQ

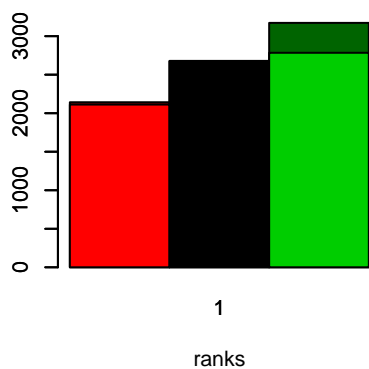

LCQ

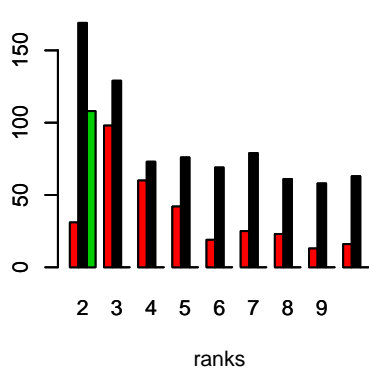

LTQ-FT

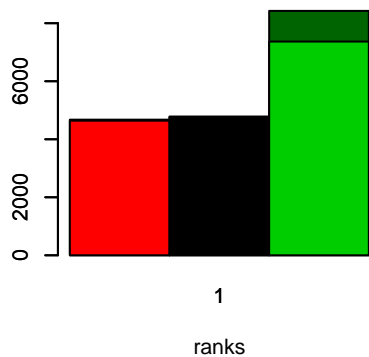

LTQ-FT

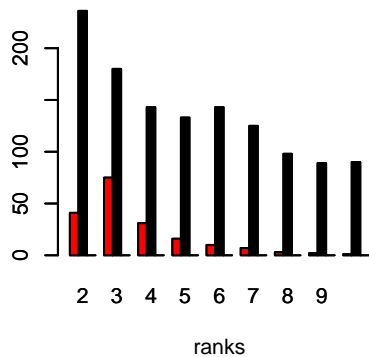

LTQ-Orbitrap

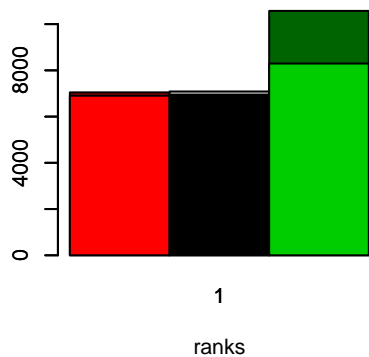

LTQ-Orbitrap

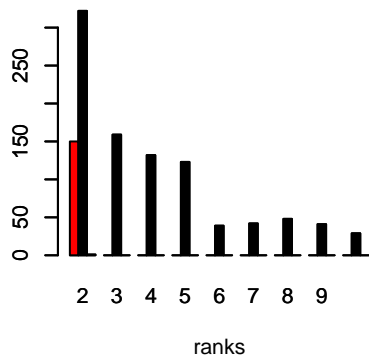

- Mascot
- OMSSA
- XTandem
- Mascot add. peptides
- OMSSA add. peptides
- XTandem add. peptides
