# Supplementary material
Source: publisher figshare collection journal article supplement (https://acs.figshare.com/ndownloader/files/4276764)

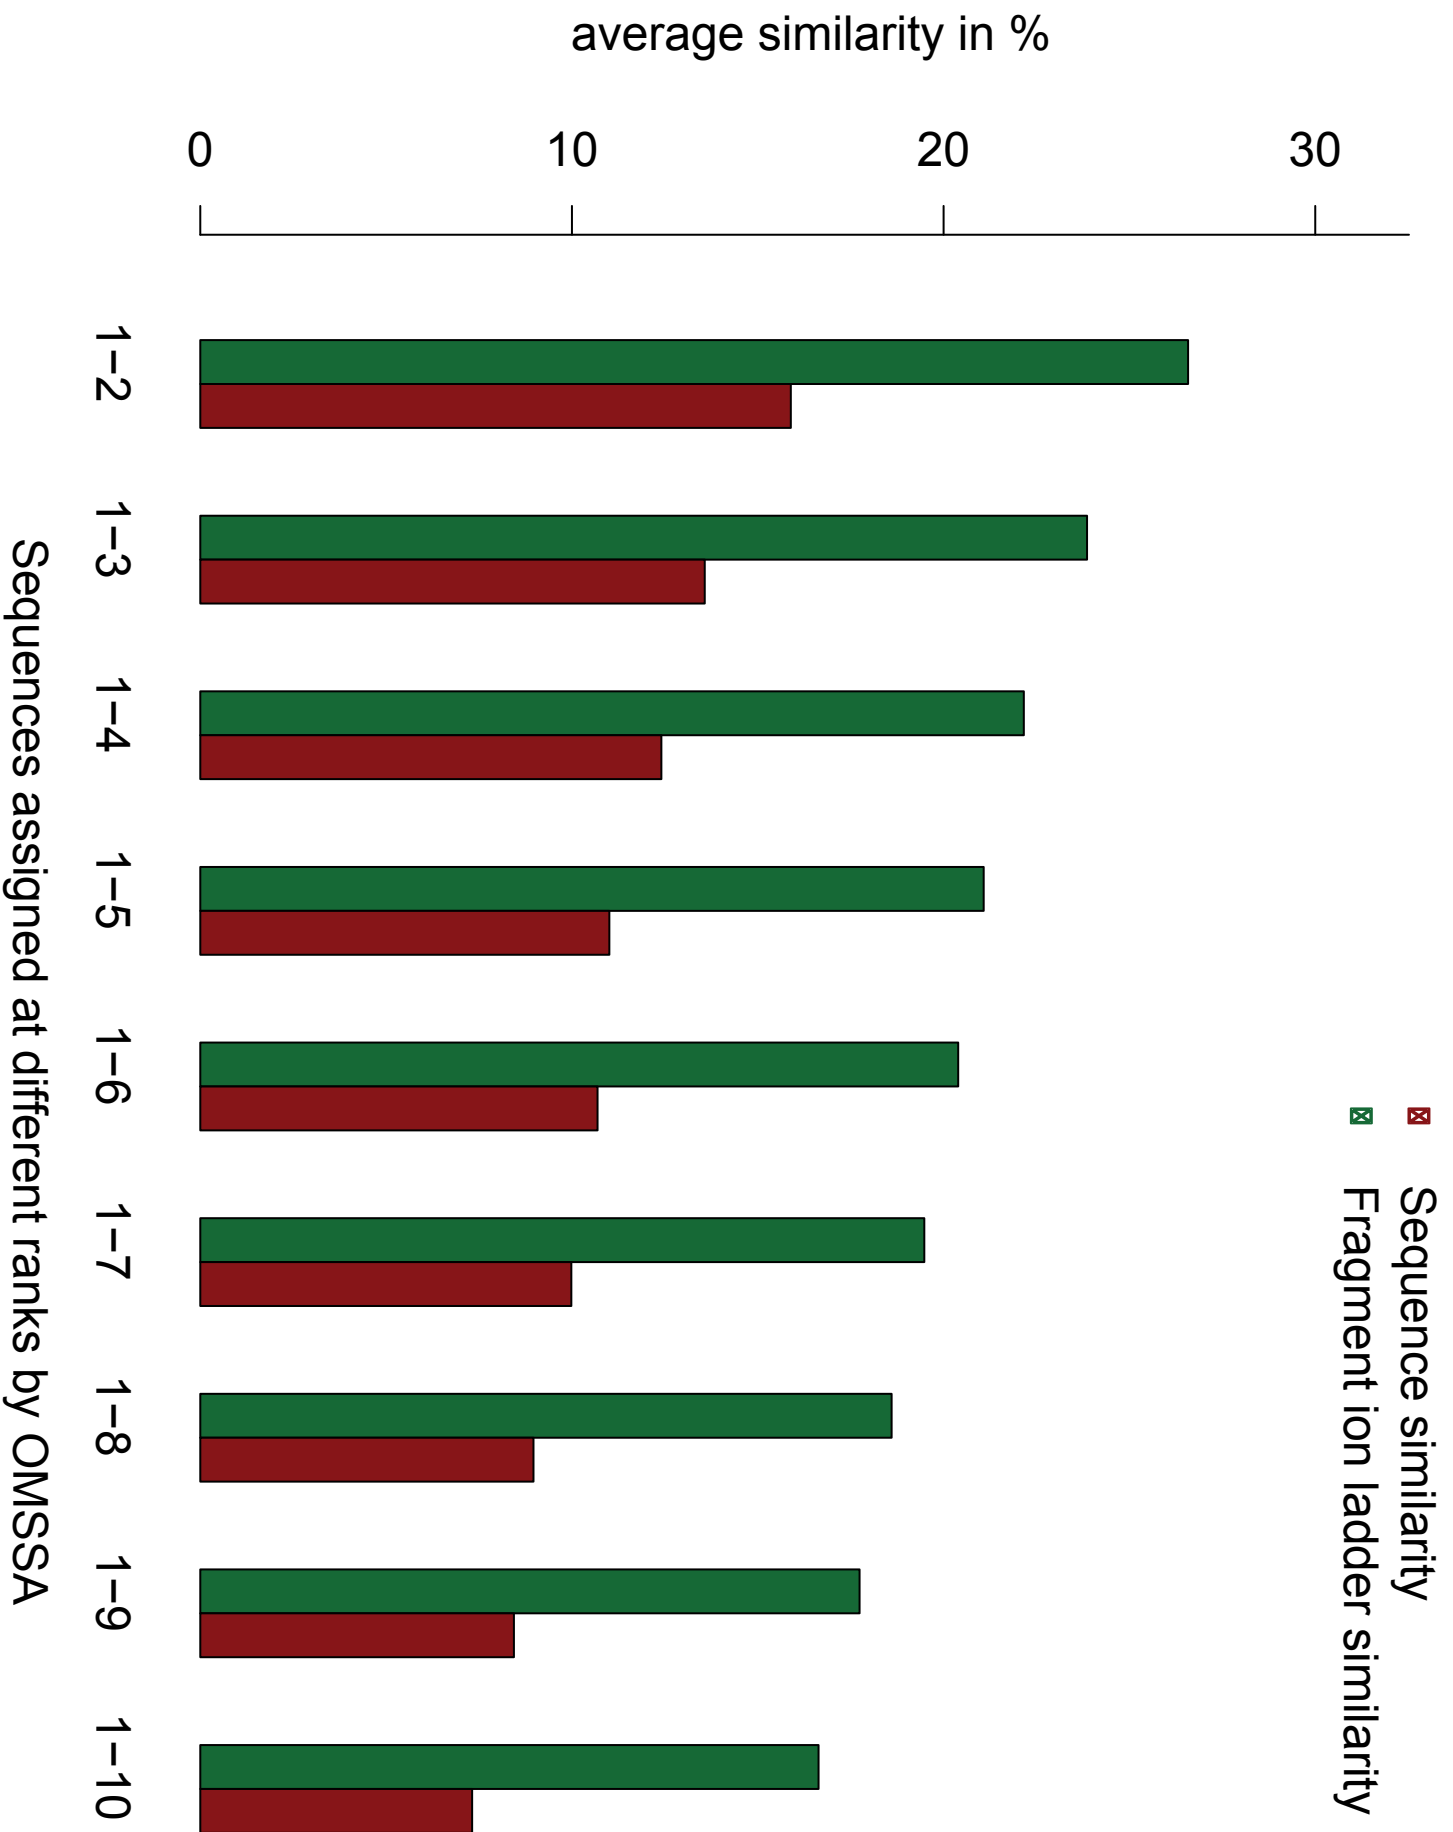

Supplement: Supplementary file 1 [file 4276764]

LCQ

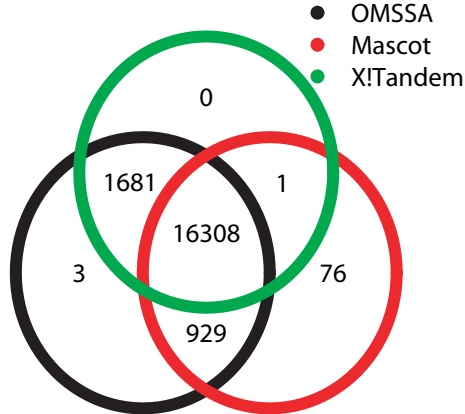

18998

LTQ-Orbitrap

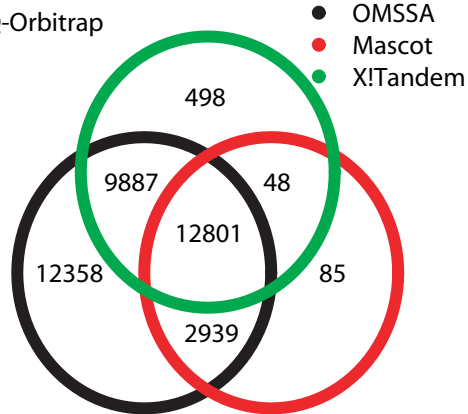

54551

LTQ-FT

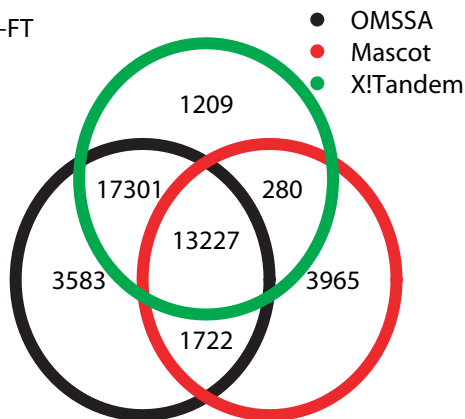

41187

Supplement: Supplementary file 2 [file 4276764]

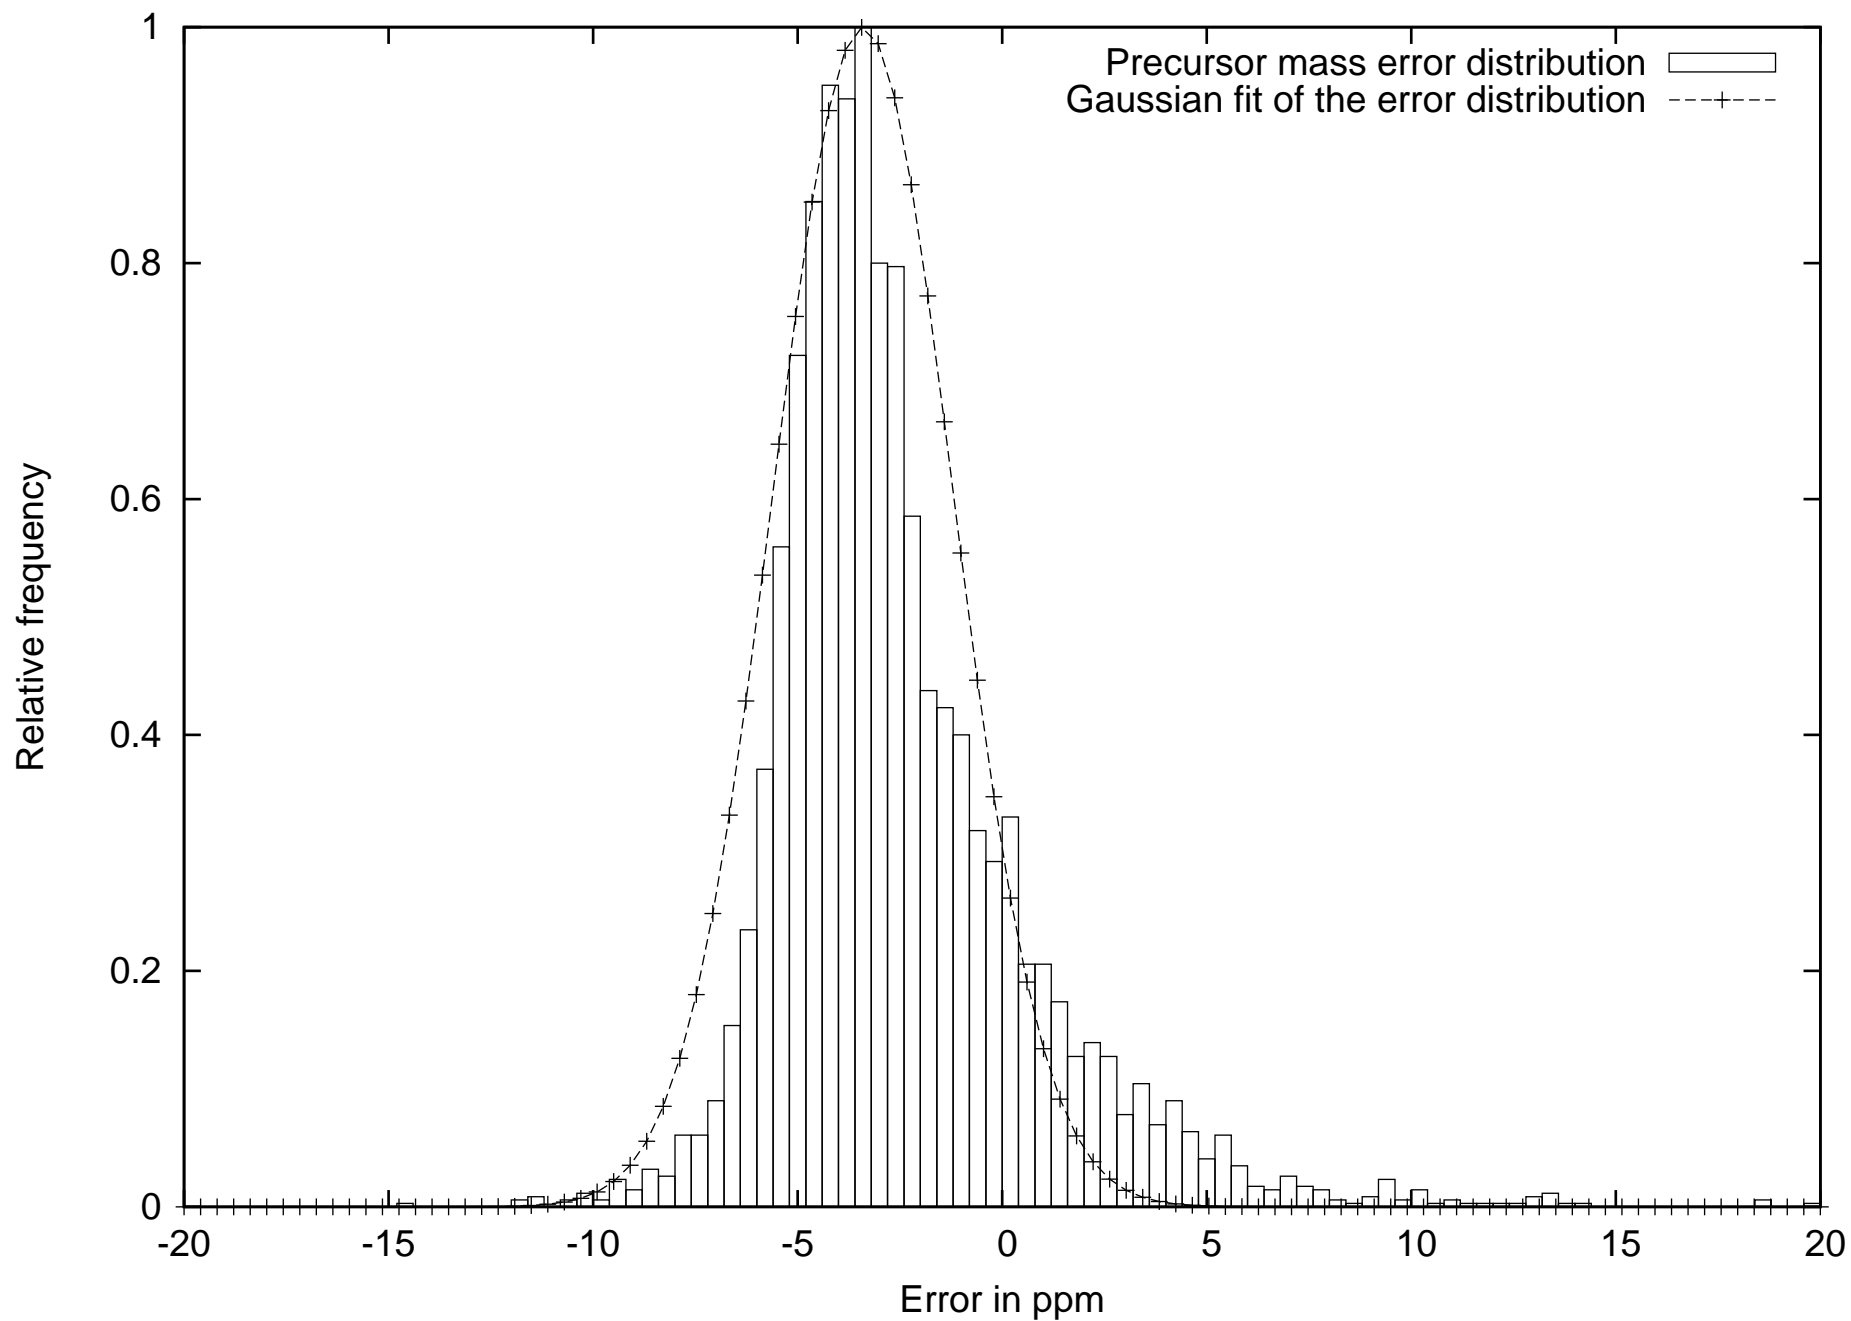

Supplement: Supplementary file 3 [file 4276764 › Nahnsen_ConsensusID_revised2_supplement/SuppFig2a.pdf]

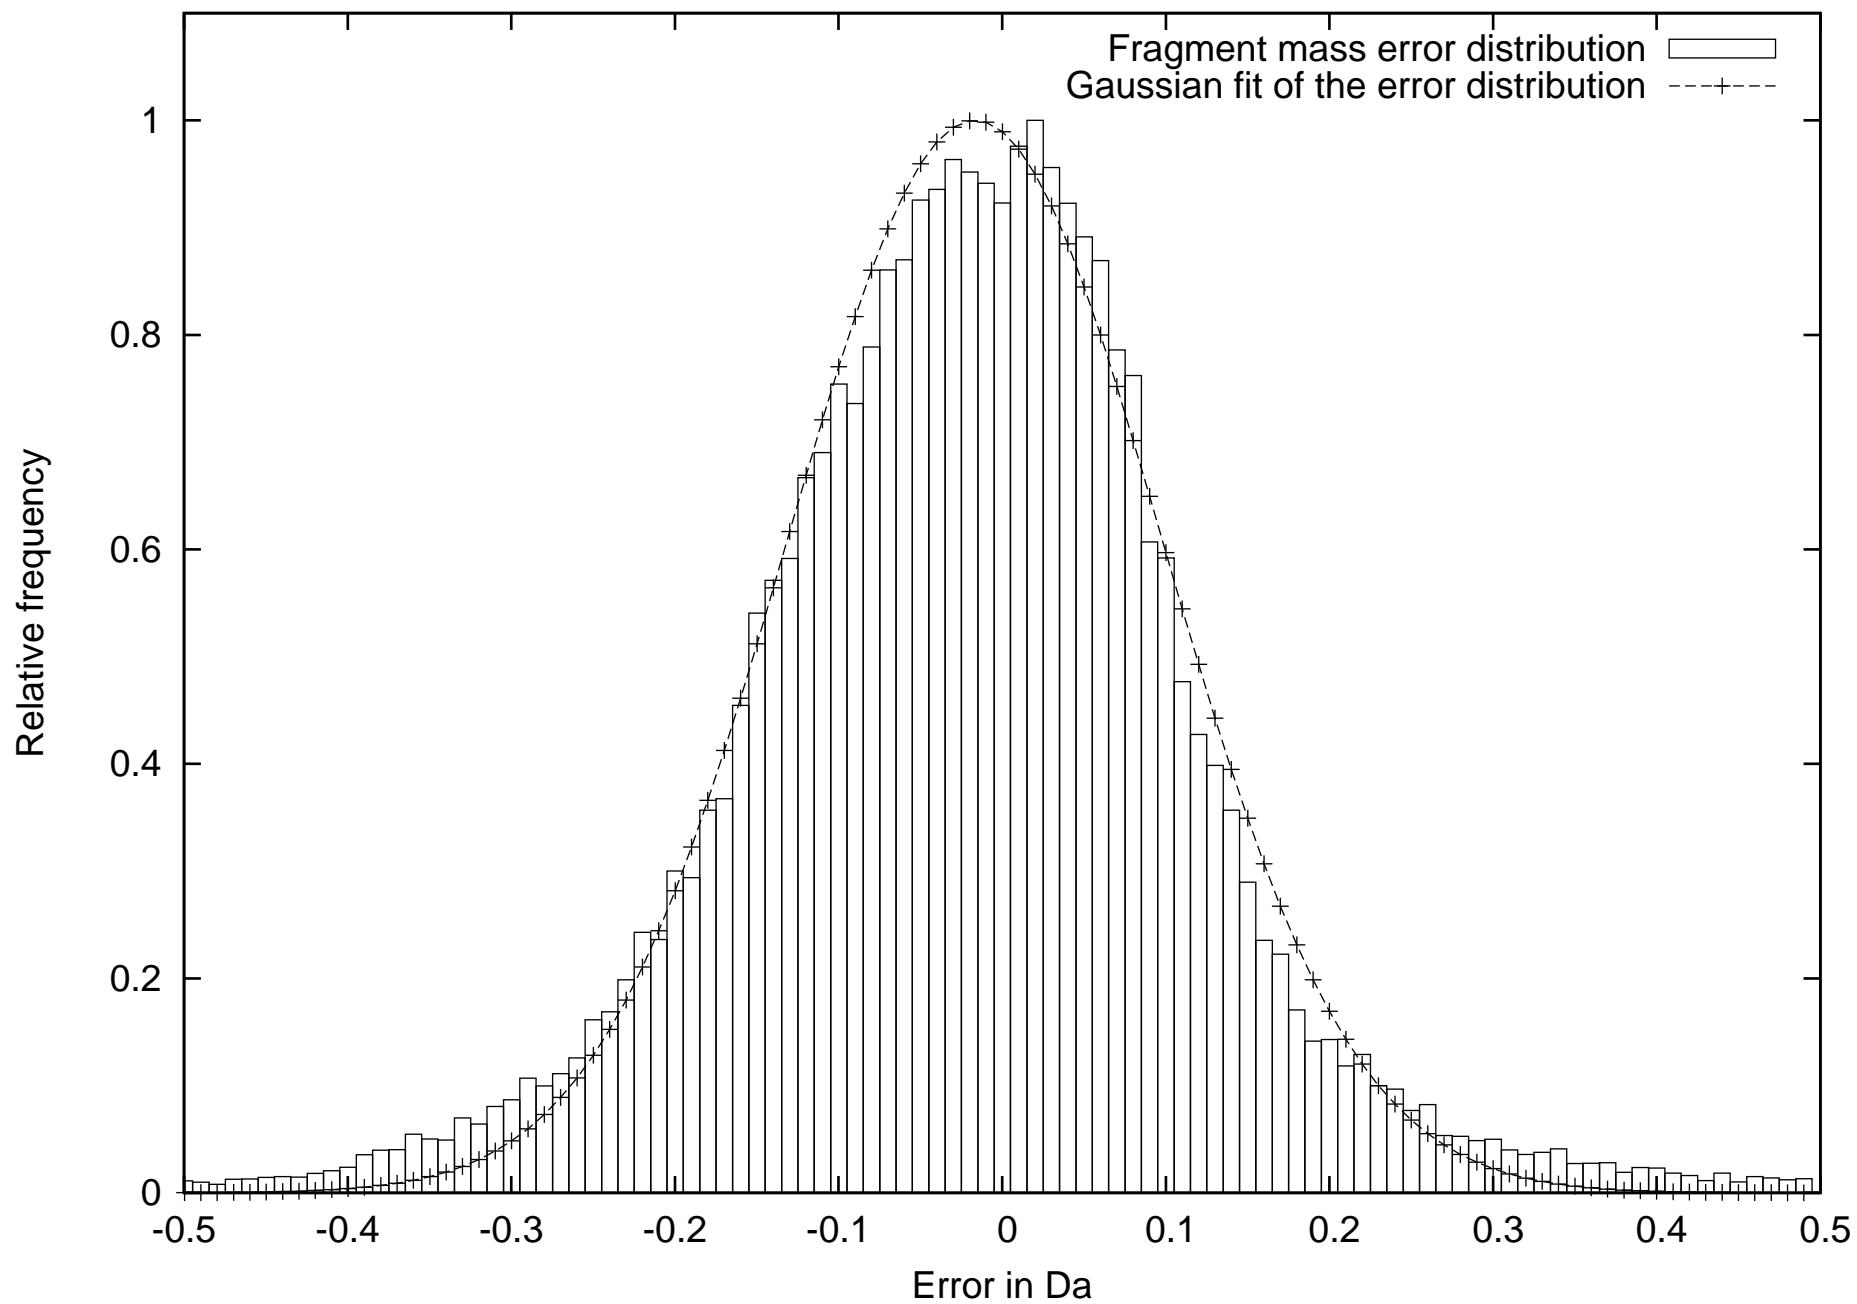

Supplement: Supplementary file 3 [file 4276764 › Nahnsen_ConsensusID_revised2_supplement/SuppFig2b.pdf]

# E.coli - LTQ-Orbitrap

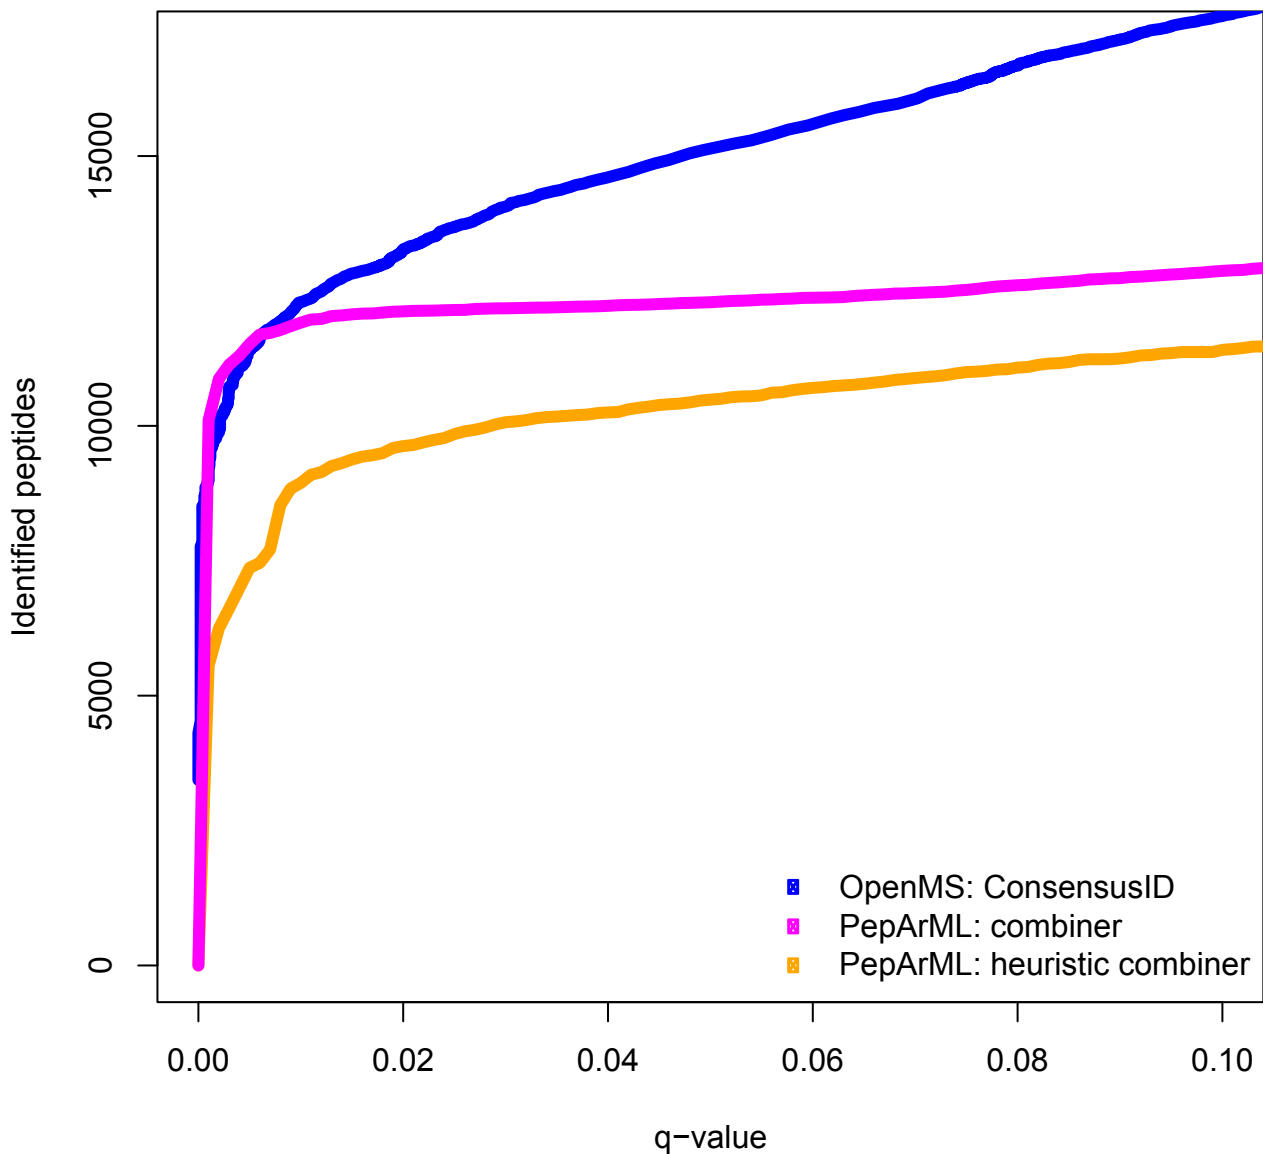

Supplement: Supplementary file 3 [file 4276764 › Nahnsen_ConsensusID_revised2_supplement/SuppFig5.pdf]
